# Supplementary material for: Conversion of oligo(ethyleneglycol)s into non-toxic highly selective biocompatible poly(ethyleneglycol)s: synthesis, antimicrobial and antibiofilm activity
Source: Royal Society of Chemistry journal article supplement (doi:10.1039/d4py01302f), 2025-01-01
Supplement: d4py01302f1.pdf [file d4py01302f1.pdf]

## SUPPORTING INFORMATION

### Converting oligo(ethyleneglycol)s into non-toxic highly selective biocompatible antimicrobial poly(ethyleneglycol)s: synthesis, antimicrobial and antibiofilm activity

*Sulbha Kumari<sup>a,#</sup>, Arpita Halder<sup>b,#</sup>, Aayush Anand<sup>a</sup>, Oindrilla Mukherjee<sup>b,\*</sup>, Subrata Chattopadhyay<sup>a,\*</sup>*

AUTHOR'S ADDRESS.

<sup>a</sup>Department of Chemistry, Indian Institute of Technology Patna, Bihta, Patna 801106, Bihar, India.

<sup>b</sup>Department of Biotechnology, National Institute of Technology Durgapur. Mahatma Gandhi Rd, A-Zone, Durgapur, West Bengal 713216

Email: [sch@iitp.ac.in](mailto:sch@iitp.ac.in) (SC), [omukherjee.bt@nitdgp.ac.in](mailto:omukherjee.bt@nitdgp.ac.in) (OM)

# SK and AH contributed equally to the current work.

#### Experimental Section-

**Materials-** Poly(ethylene glycol) diacrylate ( $M_n = 575$  and  $700$ ), tryptamine, diphenyl carbonate, ethyl carbazate, butyl amine, hexyl amine, octyl amine, dodecyl amine, deuterated dimethyl sulfoxide ( $DMSO-d_6$ , 99.9 atom % D), N-phenyl-1-naphthylamine (NPN), and Crystal violet solution were purchased from Sigma Aldrich. Dimethylformamide (DMF) HPLC grade, lithium bromide, Acetone, and Dextrose extrapure AR, ACS grade were purchased from Sisco Research Laboratories Pvt. Ltd. (SRL). Luria Bertani Broth, Luria Bertani Agar, 10X PBS, and EZcount MTT Cell Assay Kit were purchased from Himedia. Glacial acetic acid was purchased from Merck. Defibrinated sheep blood was purchased from Labline Trading Co. PEG standards for column calibration in size exclusion chromatography were purchased from Agilent Pvt. Ltd.

#### Material Characterization-

**FT-IR Spectroscopy-** The measurements were done using Perkin Elmer Spectrum 400 FTIR in ATR mode at room temperature in range of  $600-4000\text{ cm}^{-1}$ .

**Nuclear Magnetic Resonance (NMR)**-  $^1\text{H}$  and  $^{13}\text{C}$ -NMR spectra, HSQC were recorded in JEOL JNM-ECZ500R spectrometer using TMS as internal standard and DMSO- $d_6$  as NMR solvent.

**Size Exclusion Chromatography (SEC)**- SEC measurements were performed on a i-seies plus integrated HPLC attached with a Refractive index detector (Wyatt Optilab T-Rex) system. PEG standards were used for column calibration and DMF (0.01% LiBr) was used as mobile phase at a flow rate of 0.75 mL/min at 30°C. ATRA 7.3.0 software (Wyatt Technology Corporation) was used for data collection and processing.

**Thermogravimetric Analysis (TGA)**- TGA thermograms of all the polymers were recorded in SDT Q600 V20.9 Build 20 instrument under nitrogen atmosphere. The samples were heated in the temperature range of 30-500°C with heating rate of 10°C/min.

**Differential Scanning Calorimetry (DSC)**- DSC analysis was performed in PerkinElmer DSC 6000 under nitrogen atmosphere with the temperature range of -50 to 80°C with heating rate of 10°C/min. Note: All the samples were freeze dried prior to analysis to remove moisture.

**Optical density (OD)**- The OD for the minimum inhibitory concentration (MIC) analysis, biofilm inhibition assay, haemolysis assay, and cytotoxicity assay (MTT assay) was measured using a BioTek Epoch 2 Microplate Spectrophotometer (Agilent) to ensure accurate quantification of bacterial growth, biofilm formation, haemolytic activity, and cell viability in the respective assays.

**Fluorescent Intensity**- The fluorescence intensity for the NPN assay was measured using a Cary Eclipse Fluorescence Spectrophotometer (Agilent) to accurately quantify the fluorescence emitted, providing insights into membrane permeability in the bacterial cells.

**Zeta potential & Dynamic Light Scattering (DLS)** - The zeta potentials and particle size studies were performed using a zeta sizer ultra particle analyzer from Malvern (Model no: ZSU3305).

## **Synthesis-**

**Synthesis of indole-functionalized Poly(ethylene glycol) polymer (InPEG<sub>x</sub>)**- Poly(ethylene glycol) diacrylate (2 g, 3.47 mmol,  $M_n = 575$ ) was stirred in a 1:2 ratio of DMF:water mixture (20 mL) for few minutes. To this solution, tryptamine (0.557 g, 3.47 mmol) was added with constant stirring and the reaction was continued for 72 hr at room temperature. After this, the

solvent was freeze-dried using liquid nitrogen and subjected to lyophilization. The product was then washed with ethyl acetate and dried under vacuum. The obtained indole-functionalized PEG polymer (InPEG<sub>575</sub>) appeared as light-yellow viscous polymer as final product. Similar reaction procedure was used by taking poly(ethylene glycol) diacrylate (M<sub>n</sub>=700) as starting material to prepare InPEG<sub>700</sub> (Table S1).

**Table S1:** Starting material used for the synthesis of indole-functionalized PEG polymer (InPEG<sub>x</sub>).

| Polymer synthesized  | PEG Diacrylate (M <sub>n</sub> ) | PEG Diacrylate (g, mmol) | Tryptamine (g, mmol) | DMF:water (1:2) |
|----------------------|----------------------------------|--------------------------|----------------------|-----------------|
| InPEG <sub>575</sub> | 575                              | 2 g, 3.47 mmol           | 0.577 g, 3.47 mmol   | 20 mL           |
| InPEG <sub>700</sub> | 700                              | 2 g, 2.85 mmol           | 0.457 g, 2.85 mmol   | 20 mL           |

**Synthesis of Triazolinedione derivatives (C<sub>n</sub>-TAD, n= 4,6,8,12)-** TAD derivatives are synthesized using the previously reported procedure. Briefly, diphenyl carbonate (1 g, 4.668 mmol) was reacted with 1 eq. of a primary amine (butyl, hexyl, octyl, or dodecyl amine) at 85 °C under inert conditions for 40 min. Ethyl carbazate (0.485 g, 4.668 mmol) was then added, and the mixture was heated to 140 °C for 2.5 hr and subsequently to 240 °C for 1.5 hr. The resulting mixture was cooled down and washed thoroughly with diethylether. The obtained white solid compound (urazole derivatives) was dried. The synthesized urazole (0.6 g) was oxidized to corresponding TAD derivatives using 0.2 equivalents of DABCO-Br in 10 mL of dry DCM under inert conditions at room temperature for 5 hours. The reaction mixture was filtered, and the pink filtrate was concentrated to obtain the pink-coloured TAD derivatives.

**Synthesis of hydrophobically modified InPEG<sub>x</sub> with Triazolinedione derivatives (C<sub>n</sub>-TAD, n=4,6,8,12)-** To the DMF solution of InPEG<sub>x</sub> (0.1g, 1 mL), solution of C<sub>n</sub>-TAD (1 eq. with respect to indole group) in DMF (0.5 mL) was added at room temperature in inert atmosphere and stirred for 20 min. After the completion of reaction, which is observed by the disappearance of characteristic red colour of TAD, the resultant mixture was freeze dried to remove solvent. The hydrophobically modified InPEG<sub>x</sub> was obtained as yellow viscous polymer (InPEG<sub>x</sub>-C<sub>n</sub>-TAD).

**Table S2:** Starting material used for the synthesis of hydrophobically modified indole-functionalized PEG polymer (InPEG<sub>x</sub>-C<sub>n</sub>-TAD).

| S.No. | Post-modified Polymer synthesized          | InPEG <sub>x</sub> (g, mmol)             | C <sub>n</sub> -TAD (g, mmol)               |
|-------|--------------------------------------------|------------------------------------------|---------------------------------------------|
| 1.    | InPEG <sub>575</sub> -C <sub>4</sub> -TAD  | InPEG <sub>575</sub> (0.1 g, 0.136 mmol) | C <sub>4</sub> -TAD (0.021 g, 0.136 mmol)   |
| 2.    | InPEG <sub>575</sub> -C <sub>6</sub> -TAD  | InPEG <sub>575</sub> (0.1 g, 0.136 mmol) | C <sub>6</sub> -TAD (0.025 g, 0.136 mmol)   |
| 3.    | InPEG <sub>575</sub> -C <sub>8</sub> -TAD  | InPEG <sub>575</sub> (0.1 g, 0.136 mmol) | C <sub>8</sub> -TAD (0.029 g, 0.136 mmol)   |
| 4.    | InPEG <sub>575</sub> -C <sub>12</sub> -TAD | InPEG <sub>575</sub> (0.1 g, 0.136 mmol) | C <sub>12</sub> -TAD (0.0236 g, 0.136 mmol) |
| 5.    | InPEG <sub>700</sub> -C <sub>4</sub> -TAD  | InPEG <sub>700</sub> (0.1 g, 0.116 mmol) | C <sub>4</sub> -TAD (0.018 g, 0.116 mmol)   |
| 6.    | InPEG <sub>700</sub> -C <sub>6</sub> -TAD  | InPEG <sub>700</sub> (0.1 g, 0.116 mmol) | C <sub>6</sub> -TAD (0.021 g, 0.116 mmol)   |
| 7.    | InPEG <sub>700</sub> -C <sub>8</sub> -TAD  | InPEG <sub>700</sub> (0.1 g, 0.116 mmol) | C <sub>8</sub> -TAD (0.024 g, 0.116 mmol)   |
| 8.    | InPEG <sub>700</sub> -C <sub>12</sub> -TAD | InPEG <sub>700</sub> (0.1 g, 0.116 mmol) | C <sub>12</sub> -TAD (0.031 g, 0.116 mmol)  |

### Estimation of MIC of the polymers against Gram-positive and Gram-negative bacteria

*E. coli* (MTCC1302), *P. aeruginosa* (MTCC741), and *S. aureus* (MTCC96) were cultured overnight in LB broth at 37°C with shaking (120 rpm). A 1% inoculum was transferred to fresh LB media, and bacterial growth was monitored at OD<sub>600</sub> until reaching  $0.5 \pm 0.02$ . Then,  $10^8$  CFU/mL of bacteria were added to a 96-well plate. The minimum inhibitory concentration (MIC) of polymers was determined using the standard broth microdilution method (Gupta et al., 2015; He et al., 2007; Katiyar et al., 2023; Mohamed et al., 2016; Sedaghati et al., 2016). In brief, the bacteria were incubated overnight at 37°C with different polymer concentrations. OD<sub>600</sub> was measured to assess bacterial growth. The OD<sub>600</sub> values were converted to log<sub>10</sub>(CFU/mL) and a log<sub>10</sub>(CFU/mL) vs. concentration curve was plotted. The MIC<sub>90</sub> of each polymer was determined from the graph as the concentration at which log<sub>10</sub>(CFU/mL) was at 10% of the control. Three biological repeats were conducted for each experiment. The conversion value used to convert OD to CFU/ml are as follows: *E. coli* (MTCC1302), OD<sub>600</sub> of 1 =  $8 \times 10^8$  (Cho et al., 2017); *P. aeruginosa* (MTCC741), OD<sub>600</sub> of 1 =  $2 \times 10^8$  (Dong-ju Kim, 2012); *S. aureus* (MTCC96), OD<sub>600</sub> of 1 =  $1.5 \times 10^9$

### Biofilm inhibition assay (Crystal violet assay)

*E. coli* (MTCC1302), *P. aeruginosa* (MTCC741), and *S. aureus* (MTCC96) were cultured overnight in LB broth at 37°C with shaking (120 rpm). A 1% inoculum was transferred to fresh LB media containing 5% dextrose, and bacterial growth was monitored at OD<sub>600</sub> until reaching  $0.5 \pm 0.02$  using a BioTek Epoch 2 Microplate Spectrophotometer. From the culture,  $10^8$  CFU/mL of bacteria were added to a 96-well plate. Different polymer concentrations were

introduced to the bacterial suspension and incubated at 37°C to assess their effects on bacterial growth. The time required for biofilm formation *E. coli* (MTCC1302), *P. aeruginosa* (MTCC741), and *S. aureus* (MTCC96) are 96hrs (Corsini et al., 2022), 9hrs (Sathe et al., 2023), and 72hrs (Tankersley et al., 2014) respectively. So the incubation time for estimating the anti-fouling activity of the polymers were set to 96hrs for *E. coli* (MTCC1302), 9hrs for *P. aeruginosa* (MTCC741), and 72hrs for *S. aureus* (MTCC96) respectively. After incubation, the medium was removed, and the wells were gently washed three times with 1X PBS to eliminate planktonic cells. The wells were then stained with 1% crystal violet and incubated at room temperature for 20 minutes. Excess crystal violet was removed by rinsing the wells three times with 1X PBS, followed by air-drying. The bound dye was eluted with 30% acetic acid, and the optical density at 550 nm (OD<sub>550</sub>) was measured using a BioTek Epoch 2 Microplate Spectrophotometer. Three biological replicates (N=3) were performed for the experiment (Arul et al., 2020; Keshvardoust et al., 2019; Panlilio et al., 2022).

#### ***In-vitro* toxicity assay of the polymers (Hemolysis assay)**

Sheep blood was collected into a centrifuge tube and centrifuged at 1000g for 5 minutes at 4°C. After removing the supernatant, the pellet was washed twice with 1X PBS and then resuspended in 1X PBS. Fresh blood was placed in microcentrifuge tubes and treated with varying concentrations of polymers. For control purposes, 1% Triton X-100 served as the positive control, while PBS was used as the negative control. The tubes were incubated at 37°C for two hours. Following incubation, the tubes were centrifuged at 1000g for 5 minutes at 4°C. The supernatant was transferred to a fresh tube, and hemolytic activity was determined by measuring the optical density (OD<sub>405</sub>) of the hemoglobin released from red blood cells using a BioTek Epoch 2 Microplate Spectrophotometer. Each condition was tested in three biological replicates (N=3). The mean OD<sub>405</sub> values were converted into percentages of hemolytic activity and plotted on a graph to determine the HC<sub>50</sub> value of the polymers, which represents the concentration causing 50% hemolysis (Humpola et al., 2023; Jha et al., 2017; Sæbø et al., 2023).

#### **Membrane permeabilization of the polymers (NPN assay)**

The 1-N-phenyl-naphthylamine (NPN) uptake assay was conducted to assess the effect of polymers on bacterial membrane permeabilization. Bacterial cultures were collected when they reached an OD<sub>600</sub> of 0.5 ± 0.02. The cultures were centrifuged at 3500g for 5 minutes at 4°C, and the pellets were resuspended in 1X PBS. The bacterial suspensions were then transferred

to a 96-well plate for further analysis. 50µM Polymyxin B (for *P. aeruginosa*) and 0.1% Triton X-100 (for *S. aureus*) were used as positive controls, while PBS served as negative control. Polymers were added at concentrations corresponding to their MIC, followed by a 2-hour incubation at 37°C. Subsequently, 8 µL of 0.5 mM NPN (dissolved in 1:1 acetone:PBS) was added, and fluorescence intensity was recorded using a Cary Eclipse fluorescence spectrophotometer. Each experiment was tested in three biological replicates (N=3).

### **Cytotoxicity assay of the polymers (MTT assay)**

For the cell cytotoxicity assay, HEK293 (Human Embryonic Kidney) cells were seeded at a density of  $0.2 \times 10^6$  cells per well in a 12-well tissue culture plate and incubated overnight at 37°C in a CO<sub>2</sub> incubator. Once the cells reached 70–80% confluency, they were treated with 1500 µg/mL of polymers at a concentration significantly higher than the MIC and incubated overnight. The MTT assay was performed using the EZ Count MTT Cell Assay Kit as per the manufacturer's instruction. The absorbance was measured at 570 nm using a BioTek Epoch Microplate Spectrophotometer. Triton X-100 (2%) was used as the positive control, resulting in maximum cell death, while untreated cells served as the cell control, showing maximum viability. Each experiment was conducted in three biological replicates (N=3) (Arul et al., 2021, 2020; Sivagnanam et al., 2022).

Figures:

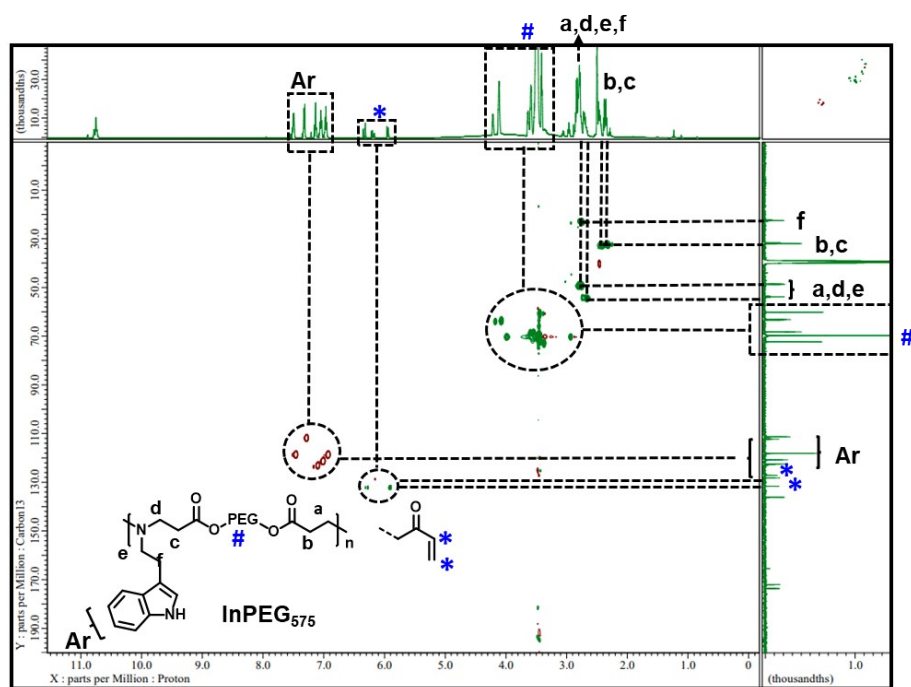

Figure S1: HSQC of InPEG<sub>575</sub>.

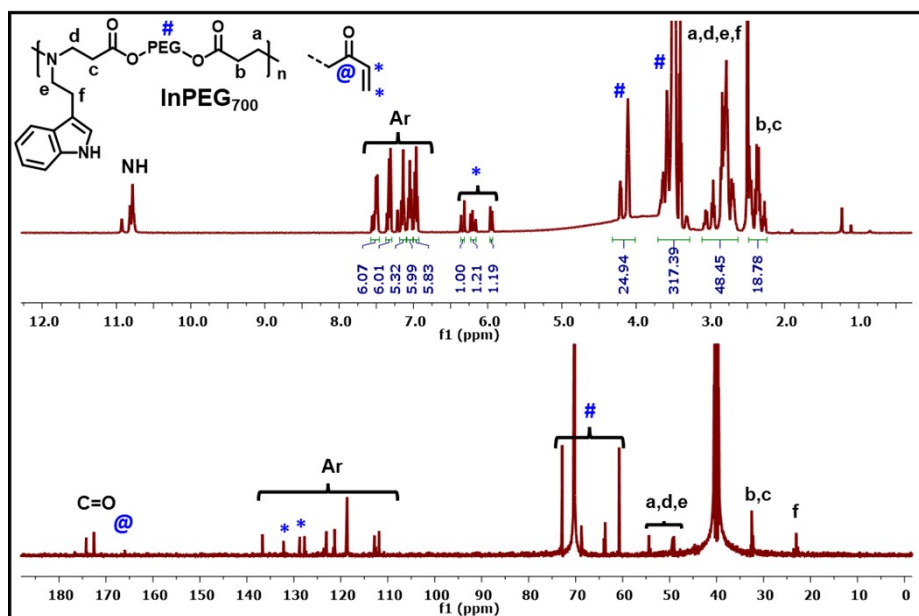

Figure S2: <sup>1</sup>H & <sup>13</sup>C-NMR spectra of InPEG<sub>700</sub>.

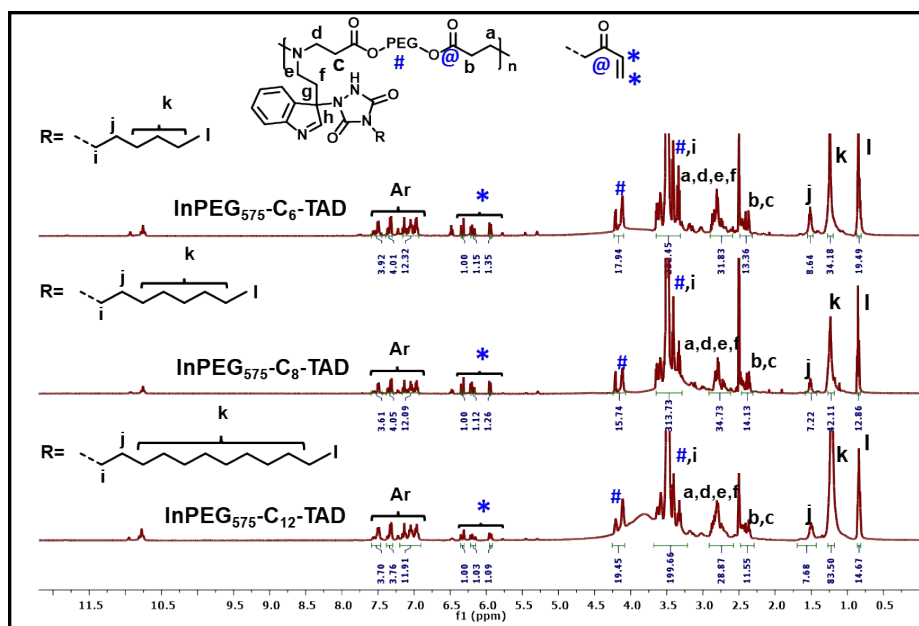

Figure S3:  $^1\text{H-NMR}$  spectra of  $\text{InPEG}_{575}\text{-C}_n\text{-TAD}$  ( $n=6, 8, 12$ ).

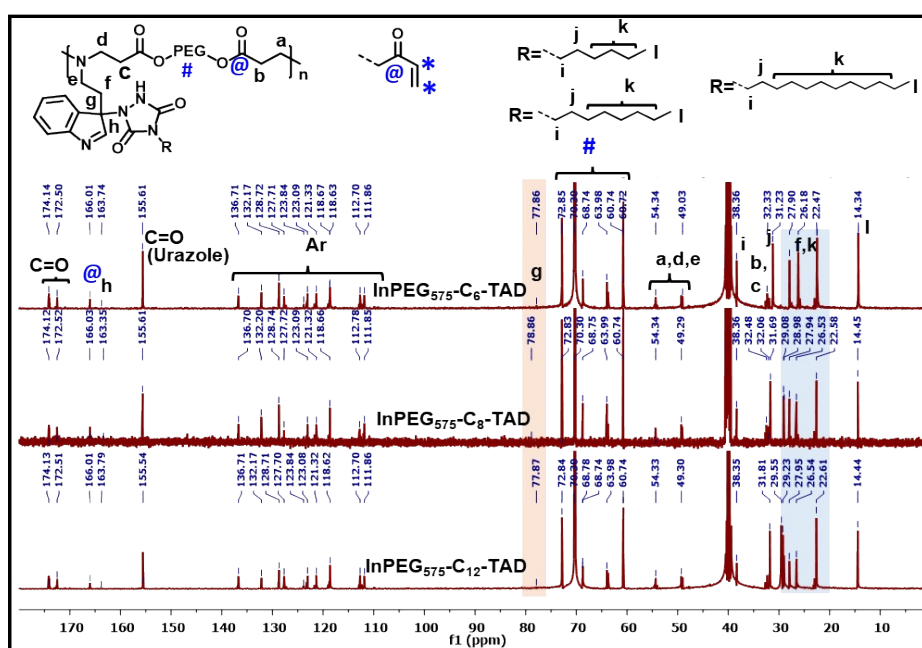

Figure S4:  $^{13}\text{C-NMR}$  spectra of  $\text{InPEG}_{575}\text{-C}_n\text{-TAD}$  ( $n=6, 8, 12$ ).



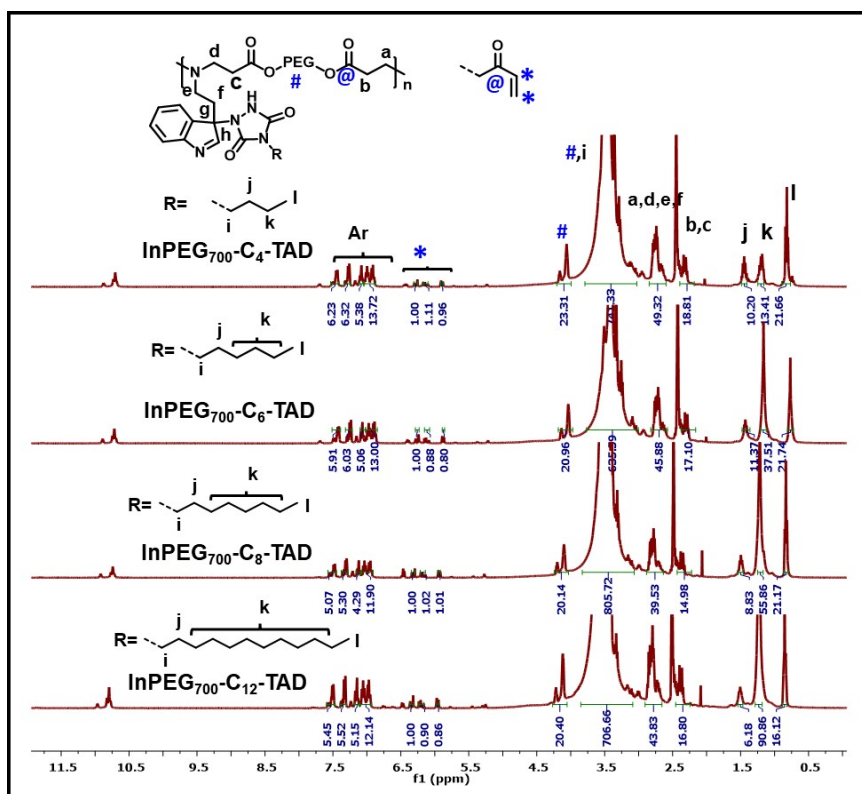

Figure S5:  $^1\text{H-NMR}$  spectra of  $\text{InPEG}_{700}\text{-C}_n\text{-TAD}$  ( $n=4,6,8,12$ ).

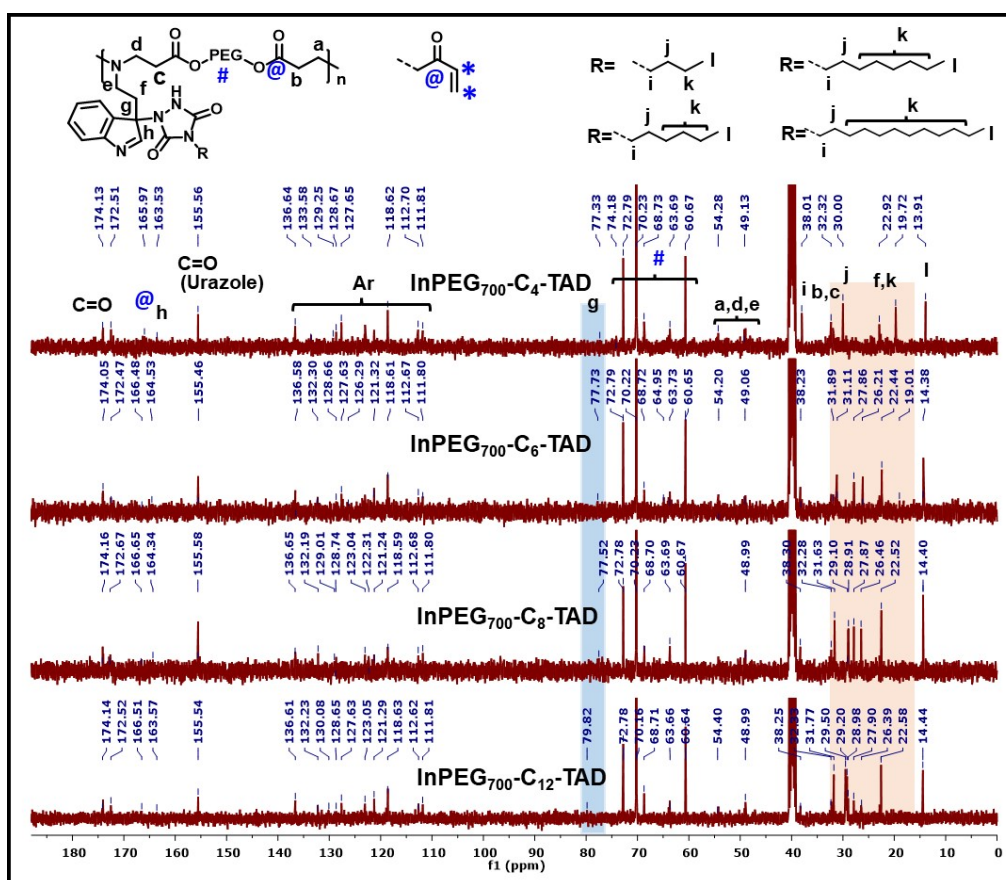

Figure S6:  $^{13}\text{C-NMR}$  spectra of  $\text{InPEG}_{700}\text{-C}_n\text{-TAD}$  ( $n=4,6,8,12$ ).

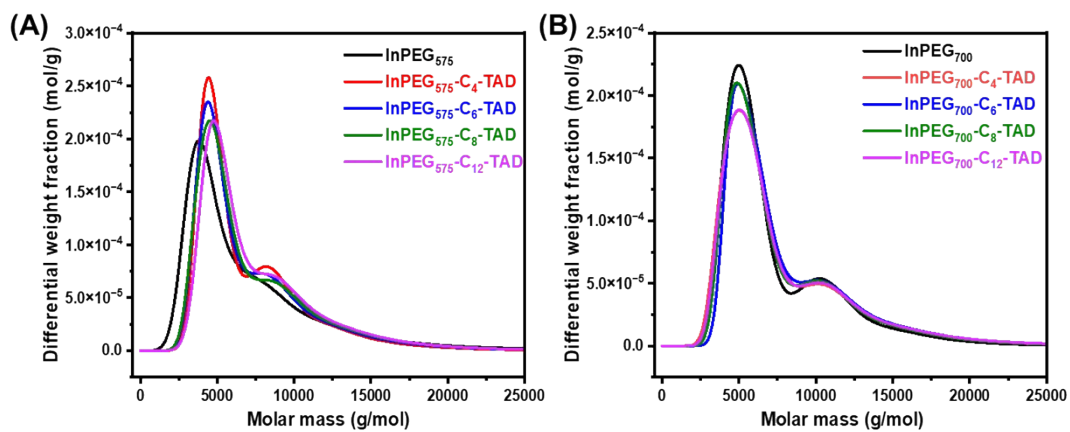

**Figure S7:** SEC curve for modified and unmodified polymer.

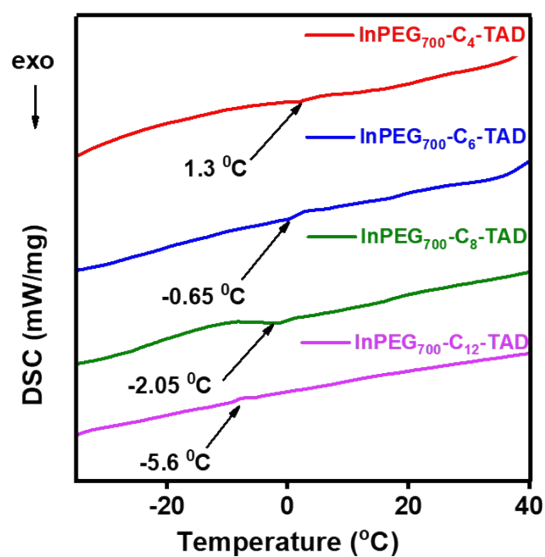

**Figure S8:** DSC thermogram of post-polymerization derivatives of InPEG<sub>700</sub>-C<sub>n</sub>-TAD (n=4,6,8,12).

## Representation Raw Data for Biological studies

### (1) Representative data showcasing the MIC calculation of two best polymers

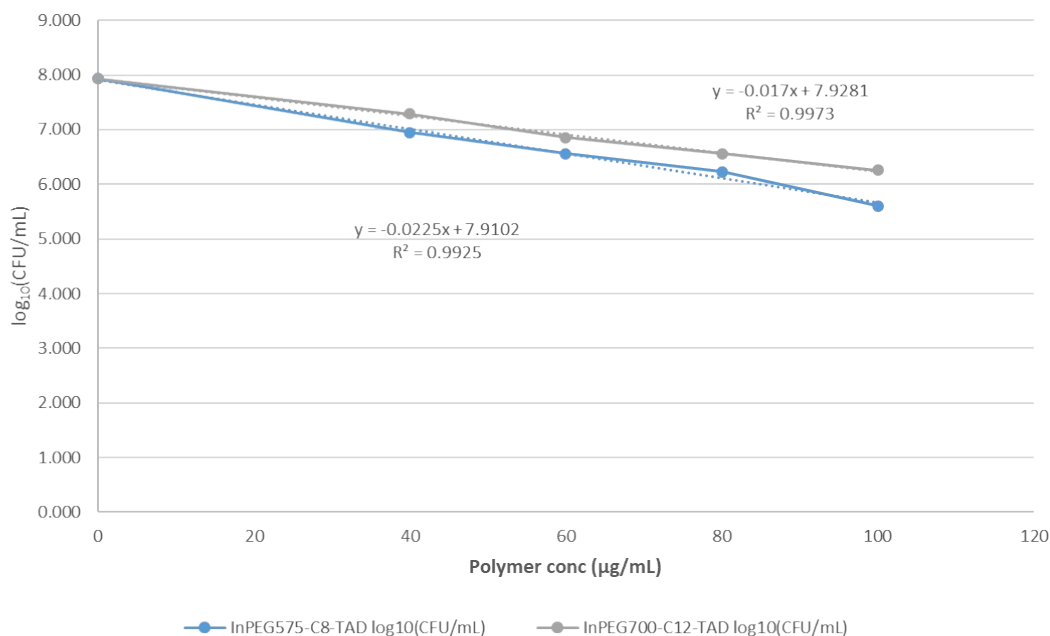

| Polymer conc ( $\mu\text{g/mL}$ ) | InPEG <sub>575</sub> -C <sub>8</sub> -TAD |           | InPEG <sub>575</sub> -C <sub>12</sub> -TAD |           |
|-----------------------------------|-------------------------------------------|-----------|--------------------------------------------|-----------|
|                                   | $\log_{10}(\text{CFU/mL})$                | OD values | $\log_{10}(\text{CFU/mL})$                 | OD values |
| 0                                 | 7.930                                     | 0.426     | 7.930                                      | 0.426     |
| 40                                | 6.944                                     | 0.044     | 7.111                                      | 0.065     |
| 60                                | 6.556                                     | 0.018     | 6.869                                      | 0.037     |
| 80                                | 6.230                                     | 0.009     | 6.146                                      | 0.007     |
| 100                               | 5.602                                     | 0.002     | 5.845                                      | 0.004     |

| Calculated MIC from graph of $\log_{10}(\text{CFU/mL})$ vs polymer concentration | Calculated MIC from graph of OD vs polymer concentration | Reported MIC |
|----------------------------------------------------------------------------------|----------------------------------------------------------|--------------|
| 43.6                                                                             | 43.4                                                     | 44           |
| 49.0                                                                             | 48.8                                                     | 49           |

**(Bacteria = *P. aeruginosa*)**

(2) Representative data shows the correlation between OD and CFU

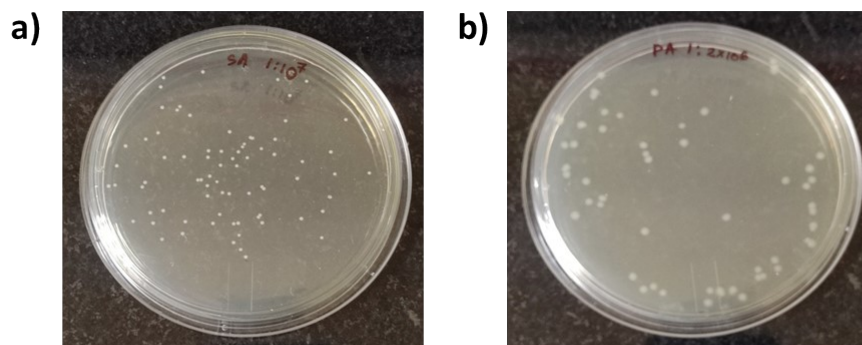

Representative figure spread plate images for (a) *S. aureus* and (b) *P. aeruginosa*

|                             |                                                                         |                      |                                                 |
|-----------------------------|-------------------------------------------------------------------------|----------------------|-------------------------------------------------|
|                             | Number of colonies in plate<br>(100 ul of OD =0.5; df=10 <sup>7</sup> ) | Calculated CFU/mL    | Used CFU/mL (reported by<br>Chang et al.)       |
| <b><i>S. aureus</i></b>     | 76                                                                      | 1.52*10 <sup>9</sup> | 1.5*10 <sup>9</sup>                             |
|                             | Number of colonies in plate<br>(50 ul of OD =0.5; df=10 <sup>6</sup> )  | Calculated CFU/mL    | Used CFU/mL (reported by<br>Dong-ju Kim et al.) |
| <b><i>P. aeruginosa</i></b> | 52                                                                      | 2.08*10 <sup>8</sup> | 2*10 <sup>8</sup>                               |

### (3) Hemolysis data:

Representative image of hemolysis assay at range of different concentrations of the polymers.

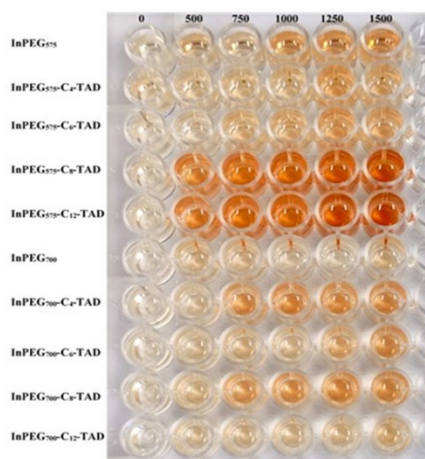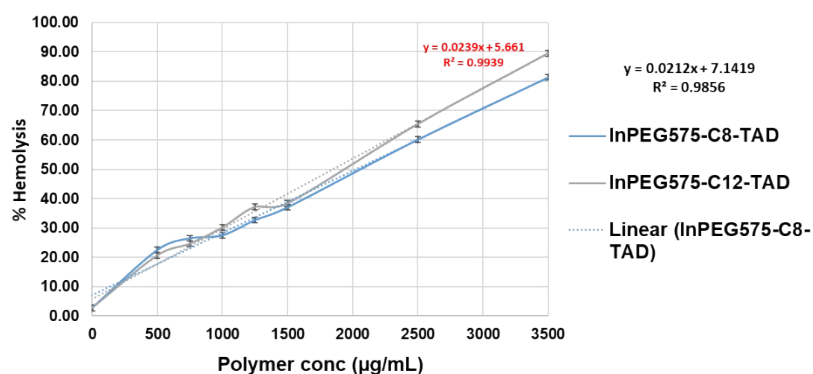

|                                            | m      | C      | % Hemolysis | HC50 |
|--------------------------------------------|--------|--------|-------------|------|
| InPEG <sub>575</sub> -C <sub>8</sub> -TAD  | 0.0212 | 7.1419 | 50          | 2022 |
| InPEG <sub>575</sub> -C <sub>12</sub> -TAD | 0.0239 | 5.661  | 50          | 1855 |

| % Hemolysis data points at different concentration |                                                         |        |                                                          |        |
|----------------------------------------------------|---------------------------------------------------------|--------|----------------------------------------------------------|--------|
| Polymer conc (µg/mL)                               | Hemolysis for InPEG <sub>575</sub> -C <sub>8</sub> -TAD | SD     | Hemolysis for InPEG <sub>575</sub> -C <sub>12</sub> -TAD | SD     |
| 0                                                  | 2.71                                                    | 0.3820 | 2.71                                                     | 0.3820 |
| 500                                                | 22.46                                                   | 0.2043 | 20.62                                                    | 0.1883 |
| 750                                                | 26.48                                                   | 0.1717 | 24.64                                                    | 0.2498 |
| 1000                                               | 27.49                                                   | 0.2971 | 30.17                                                    | 0.2920 |
| 1250                                               | 32.68                                                   | 0.3730 | 37.20                                                    | 0.0247 |
| 1500                                               | 37.03                                                   | 0.4386 | 38.37                                                    | 0.4423 |
| 2500                                               | 60.13                                                   | 0.4589 | 65.41                                                    | 0.3698 |
| 3500                                               | 81.33                                                   | 0.3431 | 89.51                                                    | 0.3667 |

### References:

- Arul, A., Rana, P., Das, K., Pan, I., Mandal, D., Stewart, A., Maity, B., Ghosh, S., Das, P., 2021. Fabrication of self-assembled nanostructures for intracellular drug delivery from diphenylalanine analogues with rigid or flexible chemical linkers. *Nanoscale Adv.* 3, 6176–6190. <https://doi.org/10.1039/d1na00510c>
- Arul, A., Sivagnanam, S., Dey, A., Mukherjee, O., Ghosh, S., Das, P., 2020. The design and development of short peptide-based novel smart materials to prevent fouling by the formation of non-toxic and biocompatible coatings. *RSC Adv.* 10, 13420–13429. <https://doi.org/10.1039/c9ra10018k>
- Chang, Y.C., Yang, C.Y., Sun, R.L., Cheng, Y.F., Kao, W.C., Yang, P.C., 2013. Rapid single cell detection of *Staphylococcus aureus* by aptamer-conjugated gold nanoparticles. *Sci. Rep.* 3, 1–7. <https://doi.org/10.1038/srep01863>
- Cho, D., Lau, I., Li, M., Zhu, D., 2017. Development of a Microtiter Plate Assay for Real Time Analysis of T7 Bacteriophage Mediated Lysis of *Escherichia coli*. *J. Exp. Microbiol. Immunol.* 21, 38–43.
- Corsini, P.M., Wang, S., Rehman, S., Fenn, K., Sagar, A., Sirovica, S., Cleaver, L., Edwards-Gayle, C.J.C., Mastroianni, G., Dorgan, B., Sewell, L.M., Lynham, S., Iuga, D., Franks, W.T., Jarvis, J., Carpenter,

G.H., Curtis, M.A., Bernadó, P., Darbari, V.C., Garnett, J.A., 2022. Molecular and cellular insight into *Escherichia coli* SsE and its role during biofilm maturation. *npj Biofilms Microbiomes* 8. <https://doi.org/10.1038/s41522-022-00272-5>

Das Gupta, B., Halder, A., Vijayakanth, T., Ghosh, N., Konar, R., Mukherjee, O., Gazit, E., Mondal, S., 2024. A broad-spectrum antibacterial hydrogel based on the synergistic action of Fmoc-phenylalanine and Fmoc-lysine in a co-assembled state. *J. Mater. Chem. B* 12, 8444–8453. <https://doi.org/10.1039/d4tb00948g>

Dong-ju Kim, 2012. Relation of microbial biomass to counting units for *Pseudomonas aeruginosa*. *African J. Microbiol. Res.* 6, 4620–4622. <https://doi.org/10.5897/ajmr10.902>

Gupta, K., Singh, S., van Hoek, M.L., 2015. Short, Synthetic cationic peptides have antibacterial activity against *Mycobacterium smegmatis* by forming pores in membrane and synergizing with antibiotics. *Antibiotics* 4, 358–378. <https://doi.org/10.3390/antibiotics4030358>

He, J., Eckert, R., Pharm, T., Simanian, M.D., Hu, C., Yarbrough, D.K., Qi, F., Anderson, M.H., Shi, W., 2007. Novel synthetic antimicrobial peptides against *Streptococcus mutans*. *Antimicrob. Agents Chemother.* 51, 1351–1358. <https://doi.org/10.1128/AAC.01270-06>

Humpola, M.V., Spinelli, R., Erben, M., Perdomo, V., Tonarelli, G.G., Albericio, F., Siano, A.S., 2023. D- and N-Methyl Amino Acids for Modulating the Therapeutic Properties of Antimicrobial Peptides and Lipopeptides. *Antibiotics* 12. <https://doi.org/10.3390/antibiotics12050821>

Jha, D., Thiruveedula, P.K., Pathak, R., Kumar, B., Gautam, H.K., Agnihotri, S., Sharma, A.K., Kumar, P., 2017. Multifunctional biosynthesized silver nanoparticles exhibiting excellent antimicrobial potential against multi-drug resistant microbes along with remarkable anticancerous properties. *Mater. Sci. Eng. C* 80, 659–669. <https://doi.org/10.1016/j.msec.2017.07.011>

Katiyar, J.D., Halder, A., Avais, M., Aidasani, H., Mukherjee, O., Chattopadhyay, S., 2023. Hydrophobic PEGylation of Chitosan: A Graft Copolymer Approach toward Developing Nontoxic Antimicrobial Chitosan. *ACS Appl. Polym. Mater.* 5, 9742–9750. <https://doi.org/10.1021/acsapm.3c01351>

Keshvardoust, P., Huron, V.A.A., Clemson, M., Constancias, F., Barraud, N., Rice, S.A., 2019. Biofilm formation inhibition and dispersal of multi-species communities containing ammonia-oxidising bacteria. *npj Biofilms Microbiomes* 5, 25–28. <https://doi.org/10.1038/s41522-019-0095-4>

Lee, H., Lim, S.I., Shin, S.H., Lim, Y., Koh, J.W., Yang, S., 2019. Conjugation of Cell-Penetrating Peptides to Antimicrobial Peptides Enhances Antibacterial Activity. *ACS Omega* 4, 15694–15701. <https://doi.org/10.1021/acsomega.9b02278>

Mohamed, M.F., Abdelkhalik, A., Seleem, M.N., 2016. Evaluation of short synthetic antimicrobial peptides for treatment of drug-resistant and intracellular *Staphylococcus aureus*. *Sci. Rep.* 6, 2–15. <https://doi.org/10.1038/srep29707>

Panlilio, H., Neel, A., Heydarian, N., Best, W., Atkins, I., Boris, A., Bui, M., Dick, C., Ferrell, M., Gu, T., Haight, T., Roedel, C.C., Rice, C. V., 2022. Antibiofilm Activity of PEGylated Branched Polyethylenimine. *ACS Omega* 7, 44825–44835. <https://doi.org/10.1021/acsomega.2c04911>

Pathak, S., Singh Chauhan, V., 2011. Rationale-based, de novo design of dehydrophenylalanine-containing antibiotic peptides and systematic modification in sequence for enhanced potency. *Antimicrob. Agents Chemother.* 55, 2178–2188. <https://doi.org/10.1128/AAC.01493-10>

Sæbø, I.P., Bjørås, M., Franzyk, H., Helgesen, E., Booth, J.A., 2023. Optimization of the Hemolysis Assay for the Assessment of Cytotoxicity. *Int. J. Mol. Sci.* 24. <https://doi.org/10.3390/ijms24032914>

Sathe, N., Beech, P., Croft, L., Suphioglu, C., Kapat, A., Athan, E., 2023. *Pseudomonas aeruginosa*: Infections and novel approaches to treatment “Knowing the enemy” the threat of *Pseudomonas aeruginosa* and exploring novel approaches to treatment. *Infect. Med.* 2, 178–194. <https://doi.org/10.1016/j.imj.2023.05.003>

Sedaghati, M., Ezzatpanah, H., Mashhadi Akbar Boojar, M., Tajabadi Ebrahimi, M., Kobarfard, F., 2016. Isolation and identification of some antibacterial peptides in the plasmin-digest of  $\beta$ -casein. *LWT* 68, 217–225. <https://doi.org/10.1016/j.lwt.2015.12.019>

Sivagnanam, S., Das, K., Basak, M., Mahata, T., Stewart, A., Maity, B., Das, P., 2022. Self-assembled dipeptide based fluorescent nanoparticles as a platform for developing cellular imaging probes and targeted drug delivery chaperones. *Nanoscale Adv.* 4, 1694–1706. <https://doi.org/10.1039/d1na00885d>

Tankersley, A., Frank, M.B., Bebak, M., Brennan, R., 2014. Early effects of *Staphylococcus aureus* biofilm secreted products on inflammatory responses of human epithelial keratinocytes. *J. Inflamm. (United Kingdom)* 11, 1–11. <https://doi.org/10.1186/1476-9255-11-17>

Wang, J., Chou, S., Xu, L., Zhu, X., Dong, N., Shan, A., Chen, Z., 2015. High specific selectivity and Membrane-Active Mechanism of the synthetic centrosymmetric  $\alpha$ -helical peptides with Gly-Gly pairs. *Sci. Rep.* 5, 1–19. <https://doi.org/10.1038/srep15963>
